# Supplementary material for: Characterization of a New qLTG3–1 Allele for Low-temperature Germinability in Rice from the Wild Species Oryza rufipogon
Source: PubMed Central journal article supplement (PMC7002630; doi:10.1186/s12284-020-0370-2), 2020-02-05
Supplement: 12284_2020_370_MOESM1_ESM.pdf [file 12284_2020_370_MOESM1_ESM.pdf]

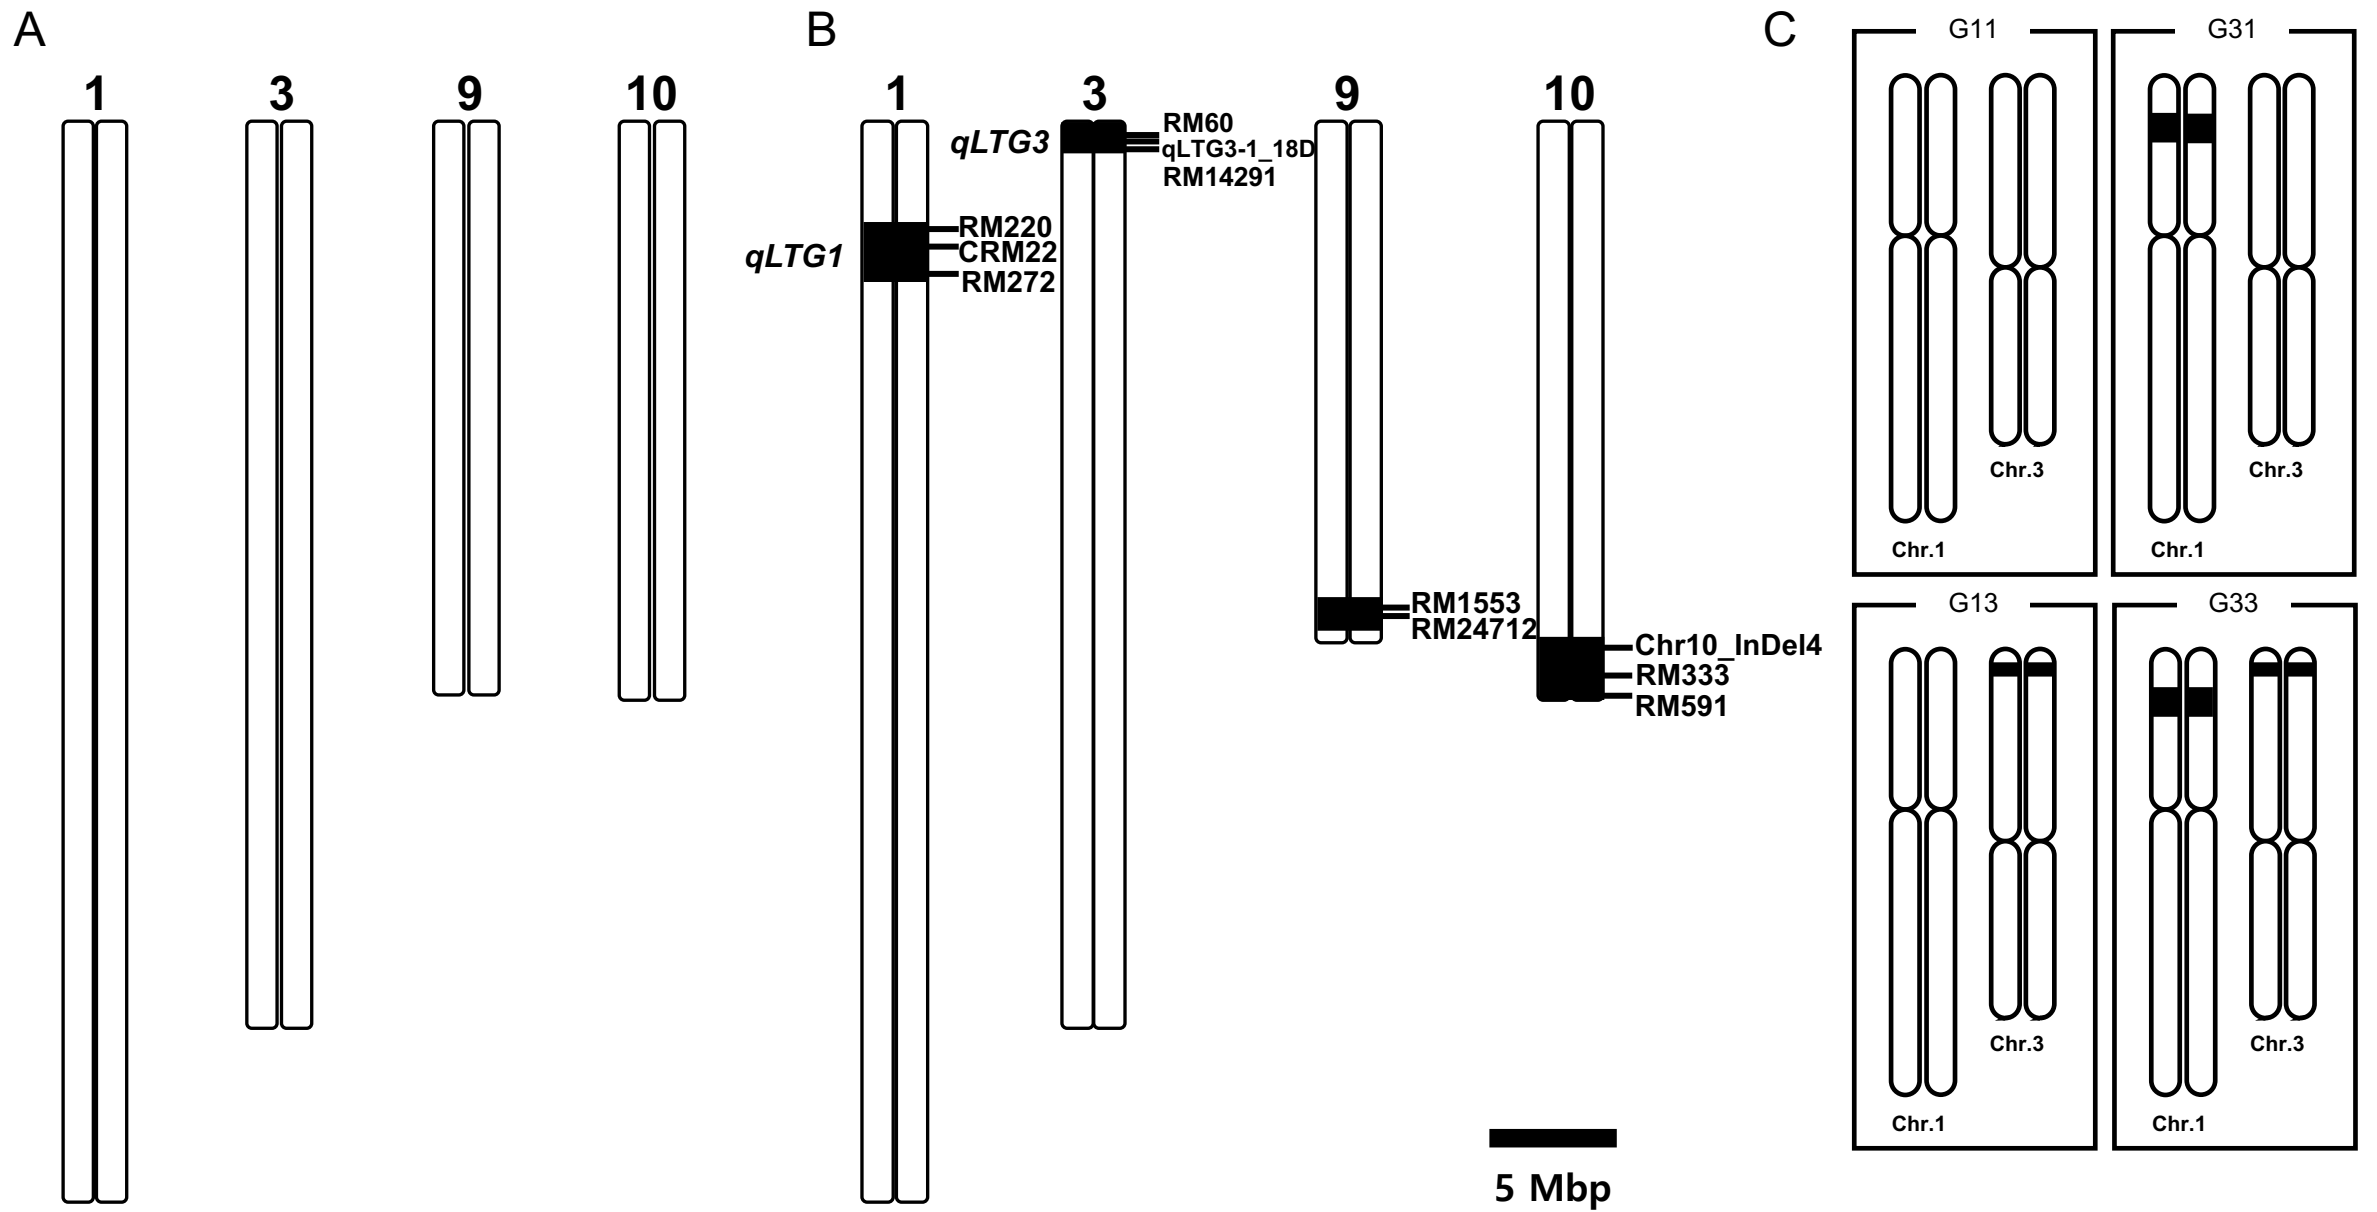

**Figure S1.** Graphical genotypes of the parental lines (A) Hwaseong, (B) TR20, and (C) four genotype groups from the F<sub>2</sub> plants. White and black bars indicate the Hwaseong and *O. rufipogon* chromosome segments, respectively.

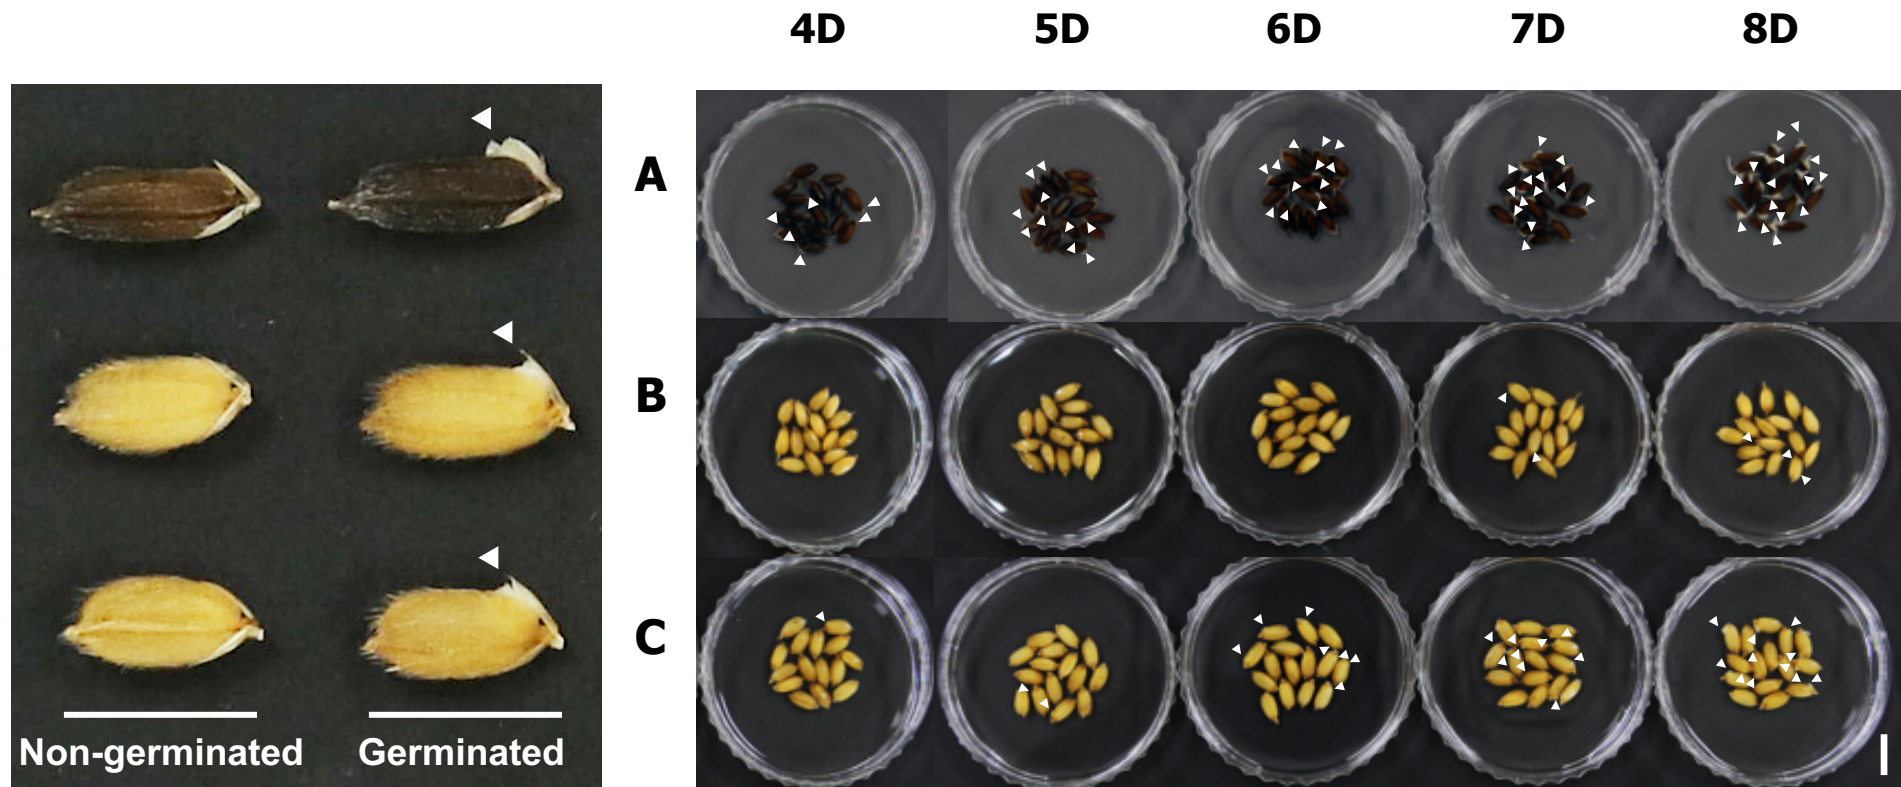

**Figure S2.** Determination of seed germination of (A) *O. rufipogon*, (B) Hwaseong, and (C) TR20 on filter papers (60 mm) in the petri dishes (60 mm) at 13 °C for 4 - 8 days after incubation. Arrowheads indicate the germinated embryo.

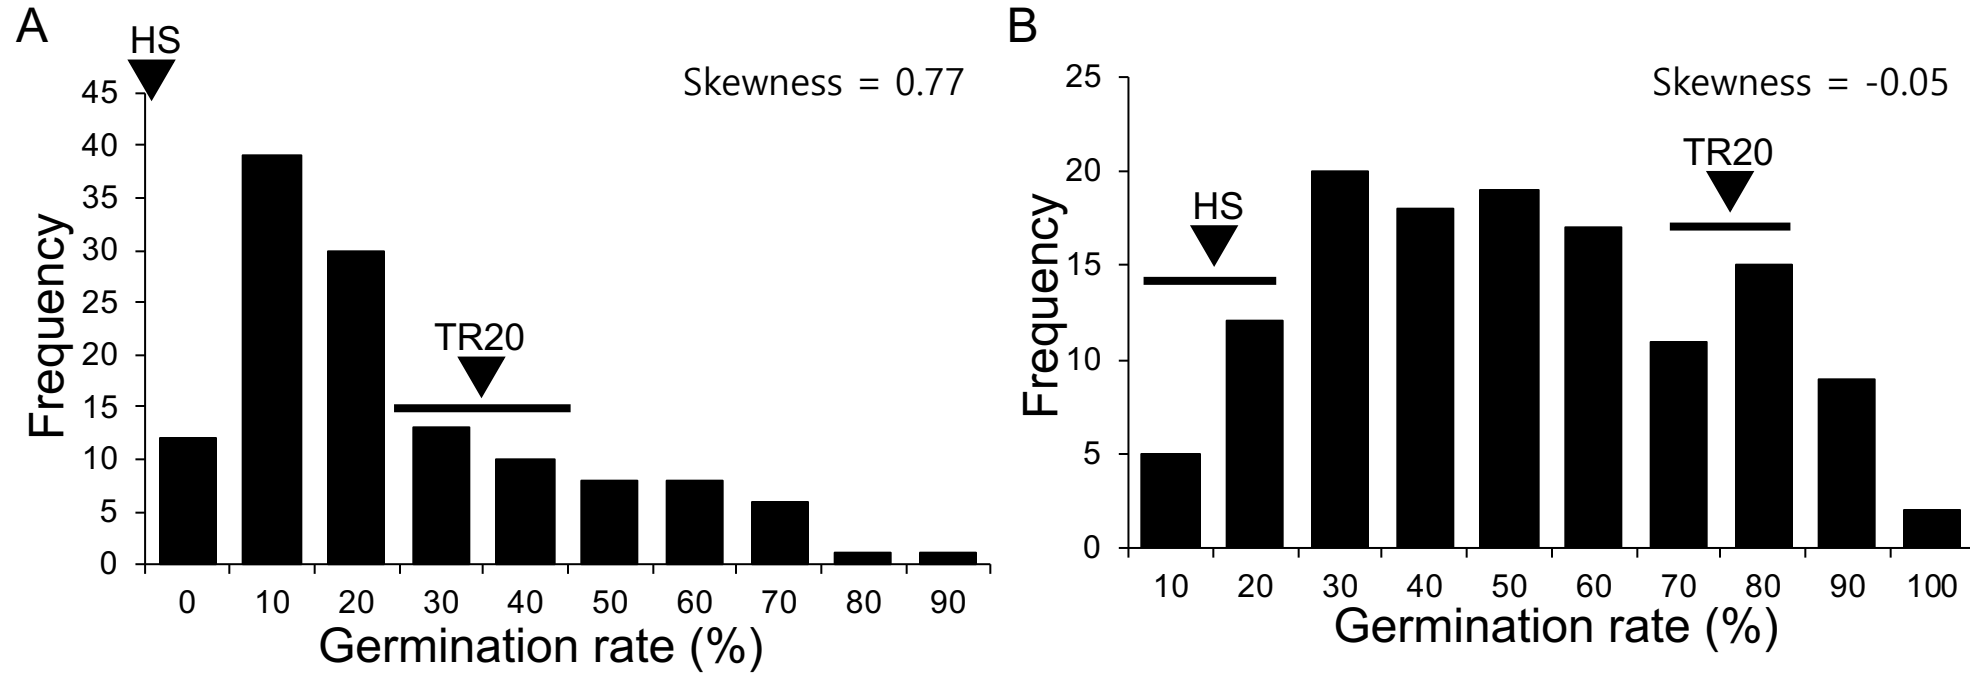

**Figure S3.** Frequency distribution of LTG at 6 days (A) and 7 days (B) after incubation of the 224  $F_2$  plants, respectively. Triangles and horizontal lines denote mean germination rates and standard error of the parental lines, respectively.

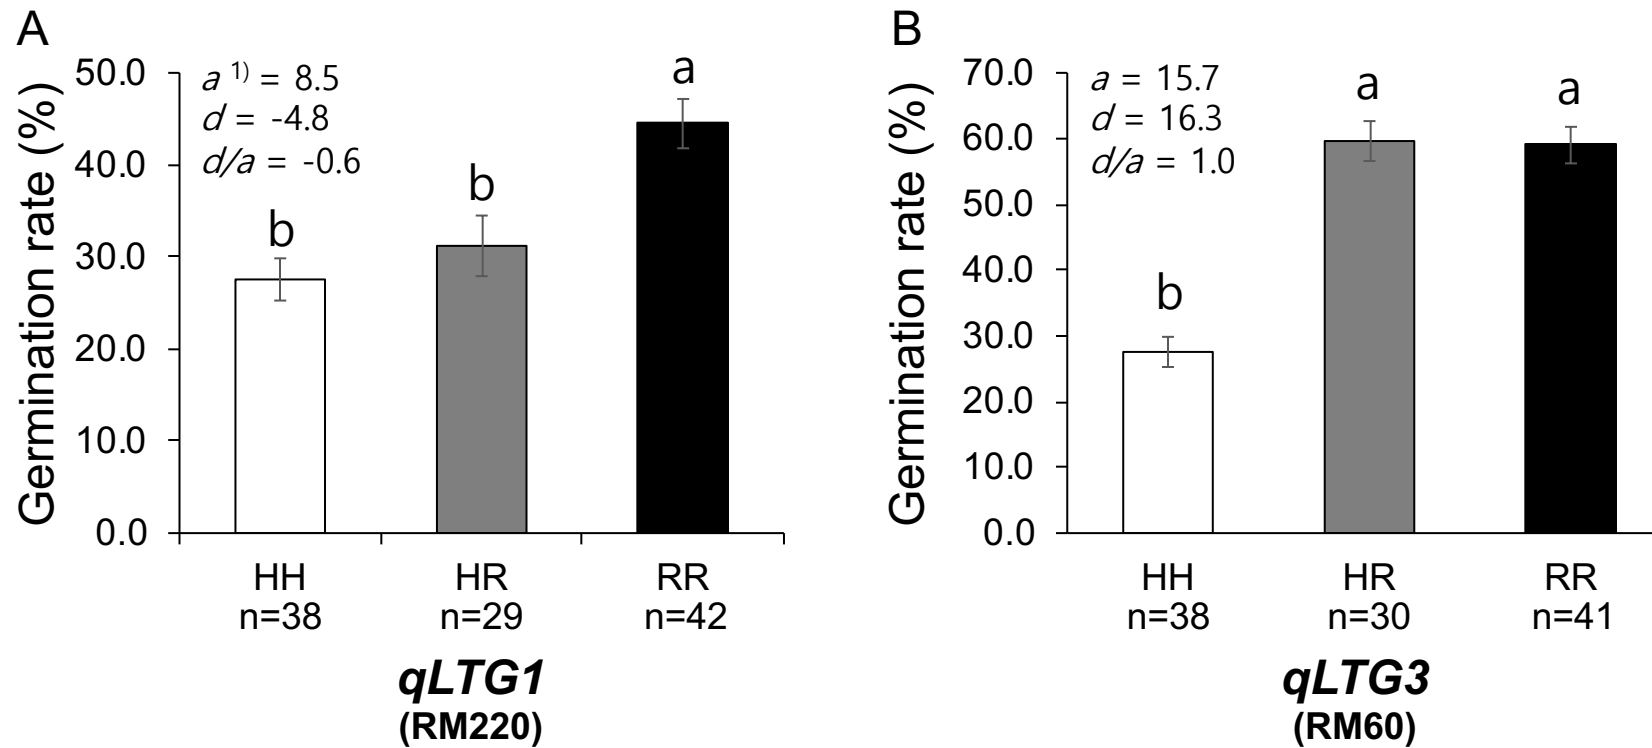

**Figure S4.** Comparison of the germination rates in plants that are segregating at (A) *qLTG1* and (B) *qLTG3* regions without other LTG QTL. RR, RH, and HH, mean *O. rufipogon* homozygous, heterozygous, and Hwaseong homozygous with the number of F<sub>2</sub> individuals, respectively. Additive effect (*a*) of the *O. rufipogon* allele, dominance effect of the *O. rufipogon* allele (*d*), and degree of dominance (*d/a*) were indicated in each figure. The same letter above box is not significantly different between the genotypes at  $P = 0.05$  based on Tukey's test.



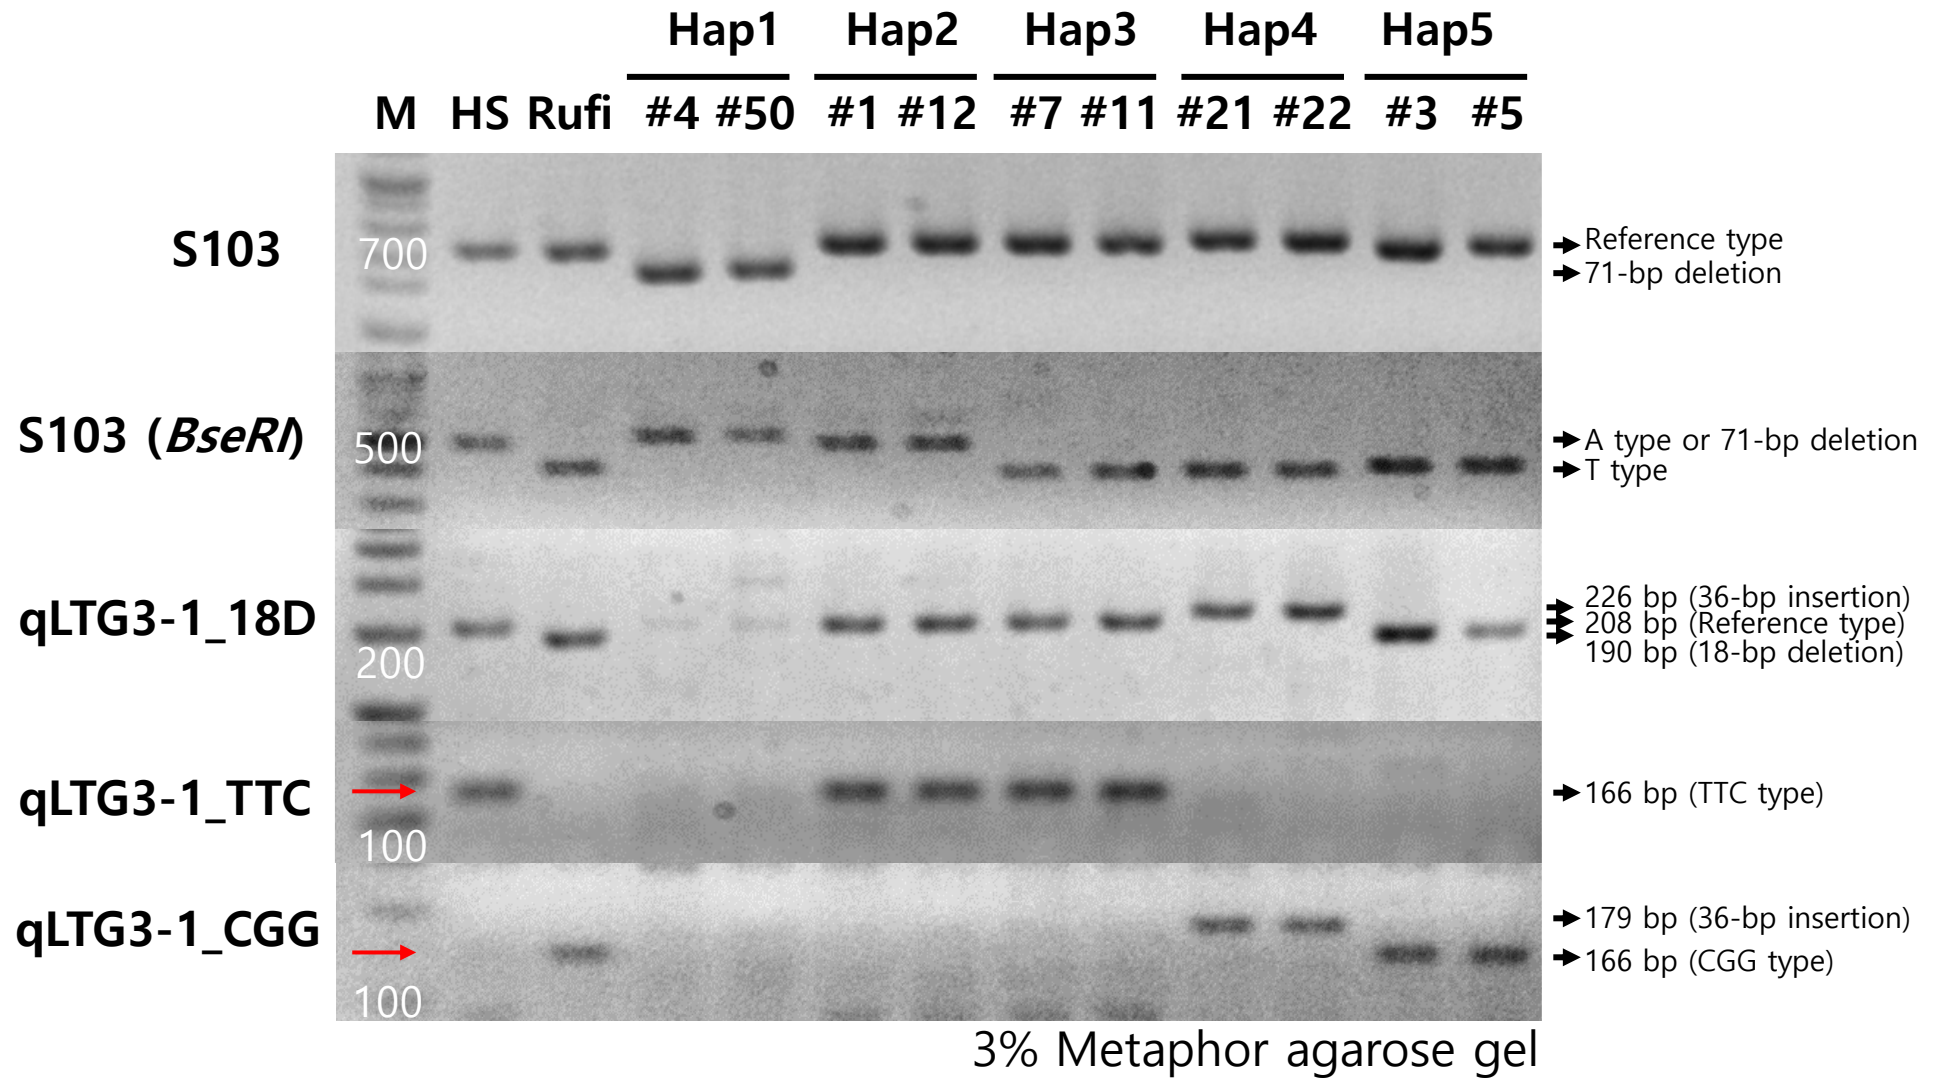

**Figure S5.** PCR amplicons of the markers used for genotyping parental lines and rice accessions for haplotype analysis. HS: Hwaseong, Rufi: *O. rufipogon*, #: RWG accession number, and M: 100-bp size marker.

**A**

**qLTG3-1\_(18D, TTC, CGG) forward**

```

Ref  GATCGCCACGCTCCTGGCCCTGAACCTCCACTTCTTACACCTTCTCCGACGCGTGCGGGCTG
HS   GATCGCCACGCTCCTGGCCCTGAACCTCCACTTCTTACACCTTCTCCGACGCGTGCGGGCTG
Rufi GATCGCCACGCTCCTGGCCCTGAACCTCCACTTCTTACACCTTCTCCGACGCGTGCGGGCTG
4    GATCGCCACGCTCCTGGCCCTGAACCTCCACTTCTTACACCTTCTCCGACGCGTGCGGGCTG
50   GATCGCCACGCTCCTGGCCCTGAACCTCCACTTCTTACACCTTCTCCGACGCGTGCGGGCTG
79   GATCGCCACGCTCCTGGCCCTGAACCTCCACTTCTTACACCTTCTCCGACGCGTGCGGGCTG
87   GATCGCCACGCTCCTGGCCCTGAACCTCCACTTCTTACACCTTCTCCGACGCGTGCGGGCTG
92   GATCGCCACGCTCCTGGCCCTGAACCTCCACTTCTTACACCTTCTCCGACGCGTGCGGGCTG
*****

```

**A/T****18-bp deletion**

```

Ref  CCAGTGCGGCTCATGCCCTAGTCCCAGCGGAGGAGGCGGTGGCGGTGGCGGTGGCGGTGG
HS   CCAGTGCGGCTCATGCCCTAGTCCCAGCGGAGGAGGCGGTGGCGGTGGCGGTGGCGGTGG
Rufi CCAGTGCGGCTCATGCCCTAGTCCCAGCGGAGGAGGCGGTGGCGGTGGCGGTGGCGGTGG
4    -----
50   -----
79   -----
87   -----
92   -----

```

**71-bp deletion****qLTG3-1\_(TTC, CGG) reverse**

```

Ref  CGGTGTTGAGGAGGCGTGGAGGTGGTGGCGGGAGCGCGGAGTTTCAGGTGGAGGCGGCGG
HS   CGGTGTTGAGGAGGCGTGGAGGTGGTGGCGGGAGCGCGGAGTTTCAGGTGGAGGCGGCGG
Rufi -----GTGAGGAGGCGTGGAGGTGGTGGCGGGAGCGCGGAGTTTCAGGTGGAGGCGGCGG
4    CGGTGTTGAGGAGGCGTGGAGGTGGTGGCGGGAGCGCGGAGTTTCAGGTGGAGGCGGCGG
50   CGGTGTTGAGGAGGCGTGGAGGTGGTGGCGGGAGCGCGGAGTTTCAGGTGGAGGCGGCGG
79   CGGTGTTGAGGAGGCGTGGAGGTGGTGGCGGGAGCGCGGAGTTTCAGGTGGAGGCGGCGG
87   CGGTGTTGAGGAGGCGTGGAGGTGGTGGCGGGAGCGCGGAGTTTCAGGTGGAGGCGGCGG
92   CGGTGTTGAGGAGGCGTGGAGGTGGTGGCGGGAGCGCGGAGTTTCAGGTGGAGGCGGCGG
*****

```

**TTC/CGG**

```

Ref  TTCAGGTGGAGGAGGAAGCGGCGCGGAGAGTTTCAGGCGGTGGAGGAAGCGGAGGCGGCGG
HS   TTCAGGTGGAGGAGGAAGCGGCGCGGAGAGTTTCAGGCGGTGGAGGAAGCGGAGGCGGCGG
Rufi TTCAGGTGGAGGAGGAAGCGGCGCGGAGAGTTTCAGGCGGTGGAGGAAGCGGAGGCGGCGG
4    TTCAGGTGGAGGAGGAAGCGGCGCGGAGAGTTTCAGGCGGTGGAGGAAGCGGAGGCGGCGG
50   TTCAGGTGGAGGAGGAAGCGGCGCGGAGAGTTTCAGGCGGTGGAGGAAGCGGAGGCGGCGG
79   TTCAGGTGGAGGAGGAAGCGGCGCGGAGAGTTTCAGGCGGTGGAGGAAGCGGAGGCGGCGG
87   TTCAGGTGGAGGAGGAAGCGGCGCGGAGAGTTTCAGGCGGTGGAGGAAGCGGAGGCGGCGG
92   TTCAGGTGGAGGAGGAAGCGGCGCGGAGAGTTTCAGGCGGTGGAGGAAGCGGAGGCGGCGG
*****

```

**qLTG3-1\_18D reverse****B****qLTG3-1\_(18D, TTC, CGG) forward**

```

Ref  GATCGCCACGCTCCTGGCCCTGAACCTCCACTTCTTACACCTTCTCCGACGCGTGCGGGCTG
HS   GATCGCCACGCTCCTGGCCCTGAACCTCCACTTCTTACACCTTCTCCGACGCGTGCGGGCTG
Rufi GATCGCCACGCTCCTGGCCCTGAACCTCCACTTCTTACACCTTCTCCGACGCGTGCGGGCTG
21   GATCGCCACGCTCCTGGCCCTGAACCTCCACTTCTTACACCTTCTCCGACGCGTGCGGGCTG
22   GATCGCCACGCTCCTGGCCCTGAACCTCCACTTCTTACACCTTCTCCGACGCGTGCGGGCTG
47   GATCGCCACGCTCCTGGCCCTGAACCTCCACTTCTTACACCTTCTCCGACGCGTGCGGGCTG
54   GATCGCCACGCTCCTGGCCCTGAACCTCCACTTCTTACACCTTCTCCGACGCGTGCGGGCTG
70   GATCGCCACGCTCCTGGCCCTGAACCTCCACTTCTTACACCTTCTCCGACGCGTGCGGGCTG
*****

```

**A/T****18-bp deletion**

```

Ref  CCAGTGCGGCTCATGCCCTAGTCCCAGCGGAGGAGGCGGTGGCGGTGGCGGTGGCGGTGG
HS   CCAGTGCGGCTCATGCCCTAGTCCCAGCGGAGGAGGCGGTGGCGGTGGCGGTGGCGGTGG
Rufi CCAGTGCGGCTCATGCCCTAGTCCCAGCGGAGGAGGCGGTGGCGGTGGCGGTGGCGGTGG
21   CCAGTGCGGCTCATGCCCTAGTCCCAGCGGAGGAGGCGGTGGCGGTGGCGGTGGCGGTGG
22   CCAGTGCGGCTCATGCCCTAGTCCCAGCGGAGGAGGCGGTGGCGGTGGCGGTGGCGGTGG
47   CCAGTGCGGCTCATGCCCTAGTCCCAGCGGAGGAGGCGGTGGCGGTGGCGGTGGCGGTGG
54   CCAGTGCGGCTCATGCCCTAGTCCCAGCGGAGGAGGCGGTGGCGGTGGCGGTGGCGGTGG
70   CCAGTGCGGCTCATGCCCTAGTCCCAGCGGAGGAGGCGGTGGCGGTGGCGGTGGCGGTGG
*****

```

**qLTG3-1\_(TTC, CGG) reverse**

```

Ref  CGGTGTTGAGGAGGCGTGGAGGTGGTGGCGGGAGCGCGGAGTTTCAGGTGGAGGCGGCGG
HS   CGGTGTTGAGGAGGCGTGGAGGTGGTGGCGGGAGCGCGGAGTTTCAGGTGGAGGCGGCGG
Rufi -----GTGAGGAGGCGTGGAGGTGGTGGCGGGAGCGCGGAGTTTCAGGTGGAGGCGGCGG
21   -----GTGAGGAGGCGTGGAGGTGGTGGCGGGAGCGCGGAGTTTCAGGTGGAGGCGGCGG
22   -----GTGAGGAGGCGTGGAGGTGGTGGCGGGAGCGCGGAGTTTCAGGTGGAGGCGGCGG
47   -----GTGAGGAGGCGTGGAGGTGGTGGCGGGAGCGCGGAGTTTCAGGTGGAGGCGGCGG
54   -----GTGAGGAGGCGTGGAGGTGGTGGCGGGAGCGCGGAGTTTCAGGTGGAGGCGGCGG
70   -----GTGAGGAGGCGTGGAGGTGGTGGCGGGAGCGCGGAGTTTCAGGTGGAGGCGGCGG
*****

```

**TTC/CGG**

```

Ref  -----AGGCGGCGGTTTCAGGTGGAGGAGGAAGCGGCGG
HS   -----AGGCGGCGGTTTCAGGTGGAGGAGGAAGCGGCGG
Rufi -----AGGCGGCGGTTTCAGGTGGAGGAGGAAGCGGCGG
21   TGGTGGAGGAAGCGGAGGCGGAGGTTTCAGGTGGAGGAGGAAGCGGCGG
22   TGGTGGAGGAAGCGGAGGCGGAGGTTTCAGGTGGAGGAGGAAGCGGCGG
47   TGGTGGAGGAAGCGGAGGCGGAGGTTTCAGGTGGAGGAGGAAGCGGCGG
54   TGGTGGAGGAAGCGGAGGCGGAGGTTTCAGGTGGAGGAGGAAGCGGCGG
70   TGGTGGAGGAAGCGGAGGCGGAGGTTTCAGGTGGAGGAGGAAGCGGCGG
*****

```

**36-bp insertion****qLTG3-1 CGG reverse**

```

Ref  CGGAGGTTTCAGGCGGTGGAGGAAGCGGAGGCGGCGGAGGAGGAAGCGGCGGCGGCGG
HS   CGGAGGTTTCAGGCGGTGGAGGAAGCGGAGGCGGCGGAGGAGGAAGCGGCGGCGGCGG
Rufi CGGAGGTTTCAGGCGGTGGAGGAAGCGGAGGCGGCGGAGGAGGAAGCGGCGGCGGCGG
21   CGGAGGTTTCAGGCGGTGGAGGAAGCGGAGGCGGCGGAGGAGGAAGCGGCGGCGGCGG
22   CGGAGGTTTCAGGCGGTGGAGGAAGCGGAGGCGGCGGAGGAGGAAGCGGCGGCGGCGG
47   CGGAGGTTTCAGGCGGTGGAGGAAGCGGAGGCGGCGGAGGAGGAAGCGGCGGCGGCGG
54   CGGAGGTTTCAGGCGGTGGAGGAAGCGGAGGCGGCGGAGGAGGAAGCGGCGGCGGCGG
70   CGGAGGTTTCAGGCGGTGGAGGAAGCGGAGGCGGCGGAGGAGGAAGCGGCGGCGGCGG
*****

```

**qLTG3-1\_18D reverse**

**Figure S6.** Sequence comparisons of the Ref (Nipponbare), HS (Hwas eong), Rufi (*O. rufipogon*) and (A) five rice accessions (RWG4, RWG50, RWG79, RWG87, RWG92) with a 71-bp deletion and (B) five rice accessions (RWG21, RWG22, RWG47, RWG54, RWG70) with a 36-bp insertion. Sequence and location of 3 markers are shown with an A/T SNP, 18-bp and 71-bp deletions, TTC/CGG, and 36-bp insertion variant site.
